# Supplementary material
Source: publisher figshare collection journal article supplement (https://tandf.figshare.com/articles/dataset/_/4765546)
Supplement: Supplementary file 1 [file 1]

Supplemental table 2: Details of stillbirth in the ICP and non-ICP groups with twin pregnancies

| No | ICP    | The diagnosis<br>GW of stillbirth | Chorionicity | Main information of the<br>stillbirth                                 |
|----|--------|-----------------------------------|--------------|-----------------------------------------------------------------------|
| 1  | Severe | 35                                | DCDA         | BW=2470g, male,                                                       |
| 2  | Severe | 34                                | DCDA         | BW=2175g, female, complicated<br>with anemia                          |
| 3  | Mild   | 34                                | DCDA         | BW=2260g, female, complicated<br>with pre-eclampsia                   |
| 4  | Mild   | 33                                | DCDA         | BW=1940g, male, complicated<br>with gestational diabetes mellitus     |
| 5  | Mild   | 35                                | DCDA         | BW=2058g, female                                                      |
| 6  | None   | 32                                | MCDA         | BW=1570g, male, complicated<br>with pregnancy induced<br>hypertension |
| 7  | None   | 31                                | DCDA         | BW=1305g, female, complicated<br>with gestational diabetes mellitus   |
| 8  | None   | 30                                | DCDA         | BW= 1420g,female,                                                     |
| 9  | None   | 31                                | DCDA         | BW=1258g, female, complicated<br>with pre-eclampsia                   |
| 10 | None   | 28                                | MCDA         | BW=980g, female                                                       |
| 11 | None   | 33                                | DCDA         | BW=2022g, male                                                        |
| 12 | None   | 35                                | DCDA         | BW=1820g, female, complicated<br>with placenta abruption              |
| 13 | None   | 32                                | DCDA         | BW=2000g, male, complicated<br>with gestational diabetes mellitus     |
| 14 | None   | 32                                | DCDA         | BW=2150g, male, complicated<br>with pre-eclampsia                     |
| 15 | None   | 27                                | DCDA         | BW=750g, male, complicated                                            |

---

|    |      |    |              |                                                                       |
|----|------|----|--------------|-----------------------------------------------------------------------|
|    |      |    |              | with hyper-thyroidism                                                 |
| 16 | None | 26 | Unidentified | BW=740g, female,                                                      |
| 17 | None | 31 | DCDA         | BW=1670g, female, complicated<br>with pre-eclampsia                   |
| 18 | None | 29 | MCDA         | BW=1640g, male                                                        |
| 19 | None | 32 | DCDA         | BW=1668g, male, complicated<br>with pregnancy induced<br>hypertension |
| 20 | None | 34 | DCDA         | BW=2425g, male, complicated<br>with gestational diabetes mellitus     |

---

ICP, intrahepatic cholestasis of pregnancy. GW, gestational week. BW, birthweight.

DCDA, dichorionic diamniotic. MCDA, monochorionic diamniotic.
