# Supplementary material
Source: publisher figshare collection journal article supplement (https://tandf.figshare.com/articles/dataset/_/4765546)
Supplement: Supplementary file 2 [file 1]

Supplemental table 1. Selected Perinatal Outcomes of Women With Controls, Mild ICP, or Severe ICP With Singleton Pregnancies\*

| Outcome                                          | n      | N(%)         | OR(95%CI)         | aOR(95%CI ) †     | P value |
|--------------------------------------------------|--------|--------------|-------------------|-------------------|---------|
| <b>Spontaneous preterm birth(&lt;37GW)</b>       |        |              |                   |                   |         |
| Controls                                         | 91,083 | 3,142(3.4)   | 1                 | 1                 |         |
| Mild ICP                                         | 1055   | 160(15.2)    | 5.00(4.21-5.94)   | 4.99(4.20-5.93)   | <0.001  |
| Severe ICP                                       | 135    | 49(36.3)     | 15.95(11.20-22.7) | 15.84(11.11-22.5) | <0.001  |
| <b>Iatrogenic preterm birth(&lt;37GW)</b>        |        |              |                   |                   |         |
| Controls                                         | 91,083 | 1,459(1.6)   | 1                 | 1                 |         |
| Mild ICP                                         | 1055   | 60(5.7)      | 3.70(2.84-4.83)   | 3.67(2.82-4.79)   | <0.001  |
| Severe ICP                                       | 135    | 11(8.1)      | 5.45(2.94-10.12)  | 5.33(2.87-9.91)   | <0.001  |
| <b>Stillbirth</b>                                |        |              |                   |                   |         |
| Controls                                         | 91,083 | 169(0.2)     | 1                 | 1                 |         |
| Mild ICP                                         | 1055   | 4(0.4)       | 2.05(0.76-5.53)   | 2.04(0.76-5.52)   | 0.158   |
| Severe ICP                                       | 135    | 2(1.5)       | 8.09(1.99-32.95)  | 8.00(1.96-32.58)  | 0.004   |
| <b>Meconium staining of the amniotic fluid**</b> |        |              |                   |                   |         |
| Controls                                         | 91,083 | 17,226(18.9) | 1                 | 1                 |         |
| Mild ICP                                         | 1055   | 206(19.5)    | 1.04(0.89-1.21)   | 1.37(1.17-1.60)   | <0.001  |
| Severe ICP                                       | 135    | 34(25.2)     | 1.44(0.98-2.13)   | 2.89(1.92-4.34)   | <0.001  |
| <b>Gestational diabetes mellitus</b>             |        |              |                   |                   |         |
| Controls                                         | 91,083 | 5,062(5.6)   | 1                 | 1                 |         |
| Mild ICP                                         | 1055   | 75(7.1)      | 1.30(1.03-1.65)   | 1.27(1.00-1.62)   | 0.046   |
| Severe ICP                                       | 135    | 17(12.6)     | 2.45(1.47-4.07)   | 2.29(1.37-3.82)   | 0.002   |

---

**Pre-eclampsia**

|          |        |            |                 |                 |        |
|----------|--------|------------|-----------------|-----------------|--------|
| Controls | 91,083 | 2,913(3.2) | 1               | 1               |        |
| Mild ICP | 1055   | 111(10.5)  | 3.72(3.05-4.55) | 3.72(3.04-4.54) | <0.001 |
| Severe   | 135    | 14(10.4)   | 3.66(2.10-6.38) | 3.63(2.09-6.33) | <0.001 |
| ICP      |        |            |                 |                 |        |

---

\*ICP, intrahepatic cholestasis of pregnancy.

† ORs were adjusted for maternal age, insurance status, pre-pregnancy body-mass index, education level, chorionicity and type of conception.

\*\*Gestational week was also included as confounder.
